# Supplementary material for: Introducing a Clustering Step in a Consensus Approach for the Scoring of Protein-Protein Docking Models
Source: PubMed Central journal article supplement (PMC5112798; doi:10.1371/journal.pone.0166460), 2016-11-15
Supplement: pone.0166460.s002.pdf [file pone.0166460.s002.pdf]

**S1 File**

for

**“Introducing a Clustering Step in a Consensus Approach for the Scoring of Protein-Protein Docking Models”**

Edrisse Chermak, Renato De Donato, Marc F. Lensink, Andrea Petta, Luigi Serra, Vittorio Scarano, Luigi Cavallo and  
Romina Oliva

**Table A. Scoring results for the SCORE\_SET targets/interfaces.** Columns 1-9: features of analysed targets: H, M, A, I and R indicate the high, medium-quality, acceptable, incorrect and removed models. NL stays for native-like, that is the sum of H, M and A models. Columns 10-16: results of the scoring with original CONSRANK scoring algorithm and with different combined Consrank-clustering approaches, based on inter-residue contacts (columns 11-13) and ligand RMSD (columns 14-16). In each column the total number of NL/H+M models per target/interface is reported. MC<sup>200</sup>, MC<sup>5</sup> and MC<sup>10</sup> indicate results of clustering with a maximum number of clusters fixed to 200 and to 1/5 and 1/10 of the total number of models per target, respectively. Positive results are highlighted in cyan.

| Target.Interface | # models | NL  | %NL  | H   | M   | A   | I    | R   | CONSRANK | Clust-CONSRANK    |                 |                  | RMSDClust<br>CONSRANK |                 |                  |
|------------------|----------|-----|------|-----|-----|-----|------|-----|----------|-------------------|-----------------|------------------|-----------------------|-----------------|------------------|
|                  |          |     |      |     |     |     |      |     |          | MC <sup>200</sup> | MC <sup>5</sup> | MC <sup>10</sup> | MC <sup>200</sup>     | MC <sup>5</sup> | MC <sup>10</sup> |
| <b>T29</b>       | 2083     | 144 | 6.9  | 2   | 72  | 70  | 1629 | 310 | 10/9*    | 2/1*              | 2/1*            | 2/1*             | 2/2*                  | 4/2*            | 3/2*             |
| <b>T30</b>       | 1343     | 2   | 0.15 | 0   | 0   | 2   | 1104 | 237 | 0/0*     | 0/0*              | 0/0*            | 0/0*             | 0/0*                  | 0/0*            | 0/0*             |
| <b>T32</b>       | 599      | 15  | 2.5  | 0   | 3   | 12  | 557  | 27  | 0/0*     | 2/0*              | 2/0*            | 1/0              | 1/0*                  | 1/0*            | 2/0*             |
| <b>T35</b>       | 499      | 2   | 0.40 | 0   | 0   | 2   | 465  | 32  | 0/0*     | 0/0*              | 0/0*            | 0/0*             | 0/0*                  | 0/0*            | 0/0*             |
| <b>T37</b>       | 1500     | 78  | 5.2  | 8   | 35  | 35  | 1060 | 362 | 9/9*     | 1/1*              | 1/1*            | 2/1*             | 2/1*                  | 2/1*            | 1/0*             |
| <b>T39</b>       | 1400     | 4   | 0.29 | 0   | 3   | 1   | 1257 | 139 | 0/0*     | 0/0*              | 0/0*            | 1/1*             | 0/0*                  | 0/0*            | 1/1*             |
| <b>T40.CA</b>    | 2180     | 354 | 16   | 90  | 141 | 123 | 1531 | 295 | 10/10*   | 1/1*              | 4/4*            | 2/2*             | 2/2*                  | 4/4*            | 2/2*             |
| <b>T40.CB</b>    | 2180     | 134 | 6.2  | 86  | 22  | 26  | 1751 | 295 | 0/0*     | 1/1*              | 1/1*            | 1/1*             | 1/1*                  | 2/2*            | 1/1*             |
| <b>T41</b>       | 1200     | 299 | 25   | 2   | 99  | 198 | 730  | 171 | 10/5*    | 4/1*              | 5/2*            | 3/1*             | 5/2*                  | 5/1*            | 3/1*             |
| <b>T46</b>       | 1699     | 24  | 1.4  | 0   | 0   | 24  | 1297 | 378 | 0/0*     | 1/0*              | 0/0*            | 0/0*             | 1/0*                  | 1/0*            | 1/0*             |
| <b>T47</b>       | 1051     | 600 | 57   | 278 | 301 | 21  | 388  | 63  | 10/10*   | 6/6*              | 8/8*            | 2/2*             | 6/6*                  | 8/8*            | 3/3*             |
| <b>T50</b>       | 1451     | 124 | 8.6  | 0   | 35  | 89  | 1141 | 184 | 0/0*     | 3/1*              | 2/0*            | 2/2*             | 1/1*                  | 0/0*            | 1/1*             |

|            |      |     |     |   |   |    |      |     |      |      |      |      |      |      |      |
|------------|------|-----|-----|---|---|----|------|-----|------|------|------|------|------|------|------|
| <b>T53</b> | 1400 | 101 | 7.2 | 0 | 9 | 92 | 1090 | 209 | 3/0* | 1/0* | 1/0* | 1/0* | 3/0* | 3/0* | 3/0* |
| <b>T54</b> | 1400 | 19  | 1.4 | 0 | 1 | 18 | 1195 | 185 | 0/0* | 1/0* | 0/0* | 1/0* | 0/0* | 0/0* | 0/0* |

**Table B.** Comparison of the performance of CONSRANK, the contact-based (Clust-CONSRANK) and the ligand RMSD-based (RMSDClust-RMSD) clustering approaches on the SCORE\_SET targets. The number of interfaces for which at least one acceptable/high-medium quality (\*) solution has been selected by each scoring approach is reported.

| <b>Method</b>             | <b>Total Interfaces with <math>\geq 1</math> NL/HM</b> |
|---------------------------|--------------------------------------------------------|
| <b>CONSRANK</b>           | 6/5*                                                   |
| <b>Clust-CONSRANK</b>     |                                                        |
| MC <sup>200</sup>         | 11/7*                                                  |
| MC <sup>/5</sup>          | 9/6*                                                   |
| MC <sup>/10</sup>         | 11/8*                                                  |
| <b>RMSDClust-CONSRANK</b> |                                                        |
| MC <sup>200</sup>         | 10/7*                                                  |
| MC <sup>/5</sup>          | 9/6*                                                   |
| MC <sup>/10</sup>         | 11/8*                                                  |

**Table C. Scoring results for the analysed targets/interfaces.** Columns 1-9: features of analysed targets: H, M, A, I and R indicate the high, medium-quality, acceptable, incorrect and removed models. NL stays for native-like, that is the sum of H, M and A models. Columns 10-16: results of the scoring with original CONSRANK and with a “redundancy removal” approach at different distance thresholds (from 25 to 80). In each column the total number of NL/H+M (\*) models per target/interface is reported. Positive results are highlighted in cyan.

| Target.Interface | # models | NL  | %NL  | H   | M   | A   | I    | R   | CONSRANK |        | Redundancy removal |       |       |       |      |
|------------------|----------|-----|------|-----|-----|-----|------|-----|----------|--------|--------------------|-------|-------|-------|------|
|                  |          |     |      |     |     |     |      |     | 25       | 30     | 40                 | 50    | 60    | 80    |      |
| <b>T29</b>       | 2083     | 144 | 6.9  | 2   | 72  | 70  | 1629 | 310 | 10/9*    | 10/7*  | 10/5*              | 9/5*  | 8/3*  | 8/2*  | 2/1* |
| <b>T30</b>       | 1343     | 2   | 0.15 | 0   | 0   | 2   | 1104 | 237 | 0/0*     | 0/0*   | 0/0*               | 0/0*  | 0/0*  | 0/0*  | 0/0* |
| <b>T32</b>       | 599      | 15  | 2.5  | 0   | 3   | 12  | 557  | 27  | 0/0*     | 0/0*   | 0/0*               | 0/0*  | 0/0*  | 0/0*  | 0/0* |
| <b>T35</b>       | 499      | 2   | 0.40 | 0   | 0   | 2   | 465  | 32  | 0/0*     | 0/0*   | 0/0*               | 0/0*  | 0/0*  | 0/0*  | 0/0* |
| <b>T37*</b>      | 1500     | 78  | 5.2  | 8   | 35  | 35  | 1060 | 362 | 9/9*     | 9/5*   | 7/3*               | 4/2*  | 4/2*  | 2/1*  | 2/1* |
| <b>T39</b>       | 1400     | 4   | 0.29 | 0   | 3   | 1   | 1257 | 139 | 0/0*     | 0/0*   | 0/0*               | 0/0*  | 0/0*  | 0/0*  | 0/0* |
| <b>T40.CA</b>    | 2180     | 354 | 16   | 90  | 141 | 123 | 1531 | 295 | 10/10*   | 10/9*  | 10/8*              | 10/7* | 10/5* | 10/3* | 5/3  |
| <b>T40.CB</b>    | 2180     | 134 | 6.2  | 86  | 22  | 26  | 1751 | 295 | 0/0*     | 0/0*   | 0/0*               | 0/0*  | 0/0*  | 0/0*  | 0/0* |
| <b>T41</b>       | 1200     | 299 | 25   | 2   | 99  | 198 | 730  | 171 | 10/5*    | 10/7*  | 10/5*              | 7/1*  | 6/0*  | 4/0*  | 3/0* |
| <b>T46</b>       | 1699     | 24  | 1.4  | 0   | 0   | 24  | 1297 | 378 | 0/0*     | 2/0*   | 1/0*               | 1/0*  | 2/0*  | 3/0*  | 2/0* |
| <b>T47</b>       | 1051     | 600 | 57   | 278 | 301 | 21  | 388  | 63  | 10/10*   | 10/10* | 10/10*             | 7/6*  | 3/2*  | 3/1*  | 1/1* |
| <b>T50</b>       | 1451     | 124 | 8.6  | 0   | 35  | 89  | 1141 | 184 | 0/0*     | 1/1*   | 3/2*               | 4/2*  | 4/1*  | 5/1*  | 2/0* |
| <b>T53</b>       | 1400     | 101 | 7.2  | 0   | 9   | 92  | 1090 | 209 | 3/0*     | 5/0*   | 4/0*               | 5/0*  | 6/0*  | 3/0*  | 0/0* |

|              |      |    |      |   |   |    |      |     |      |      |      |      |      |      |      |
|--------------|------|----|------|---|---|----|------|-----|------|------|------|------|------|------|------|
| <b>T54</b>   | 1400 | 19 | 1.4  | 0 | 1 | 18 | 1195 | 185 | 0/0* | 0/0* | 0/0* | 0/0* | 0/0* | 0/0* | 0/0* |
| <b>T72.1</b> | 914  | 6  | 0.66 | 0 | 0 | 6  | 659  | 249 | 0/0* | 0/0* | 0/0* | 0/0* | 0/0* | 0/0* | 0/0* |
| <b>T79.1</b> | 999  | 20 | 2.0  | 0 | 7 | 13 | 701  | 278 | 0/0* | 0/0* | 0/0* | 0/0* | 0/0* | 0/0* | 0/0* |
| <b>T79.2</b> | 999  | 63 | 6.3  | 0 | 7 | 56 | 658  | 278 | 0/0* | 0/0* | 0/0* | 0/0* | 0/0* | 0/0* | 0/0* |
| <b>T79.3</b> | 999  | 2  | 0.20 | 0 | 0 | 2  | 719  | 278 | 0/0* | 0/0* | 0/0* | 0/0* | 0/0* | 0/0* | 0/0* |
| <b>T86.1</b> | 1010 | 30 | 3.0  | 0 | 5 | 25 | 942  | 38  | 0/0* | 0/0* | 0/0* | 0/0* | 0/0* | 0/0* | 1/0* |
| <b>T86.2</b> | 1010 | 25 | 2.5  | 0 | 8 | 17 | 947  | 38  | 0/0* | 0/0* | 0/0* | 0/0* | 0/0* | 0/0* | 0/0* |

**Table D.** Comparison between CONSRANK, Clust-CONSRANK and the Redundancy-removal approach: the number of interfaces for which at least one acceptable/high-medium quality (\*) solution has been selected by each scoring approach/threshold is reported.

| <b>Method</b>         | <b>Total Interfaces with <math>\geq 1</math> NL/HM</b> |
|-----------------------|--------------------------------------------------------|
| <b>CONSRANK</b>       | 6/5*                                                   |
| <b>Clust-CONSRANK</b> |                                                        |
| <b>S<sup>25</sup></b> | 10/4*                                                  |
| <b>S<sup>30</sup></b> | 12/5*                                                  |
| <b>C<sup>40</sup></b> | 10/7*                                                  |

|                           |       |
|---------------------------|-------|
| $C^{50}$                  | 11/6* |
| $C^{60}$                  | 12/7* |
| $C^{80}$                  | 10/5* |
| $MC^{200}$                | 13/7* |
| $MC^{/5}$                 | 11/6* |
| $MC^{/10}$                | 14/8* |
| <b>Redundancy-removal</b> |       |
| <b>25</b>                 | 8/6*  |
| <b>30</b>                 | 8/6*  |
| <b>40</b>                 | 8/6*  |
| <b>50</b>                 | 8/5*  |
| <b>60</b>                 | 8/5*  |
| <b>80</b>                 | 8/4*  |
